# Supplementary material for: Cancer driver genes: a guilty by resemblance doctrine
Source: PubMed Central journal article supplement (PMC6598669; doi:10.7717/peerj.6979), 2019-06-25

**LIG1 p-value Distribution**

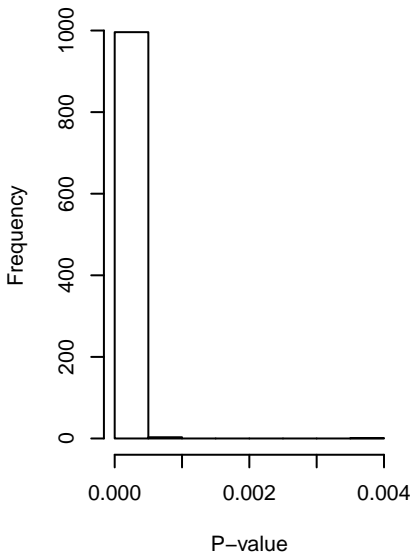

**HDAC7 p-value Distribution**

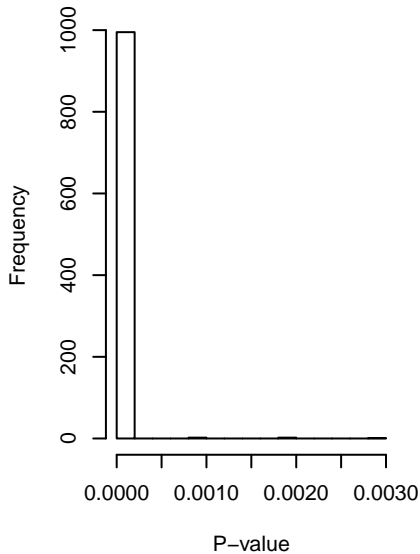

**RASA1 p-value Distribution**

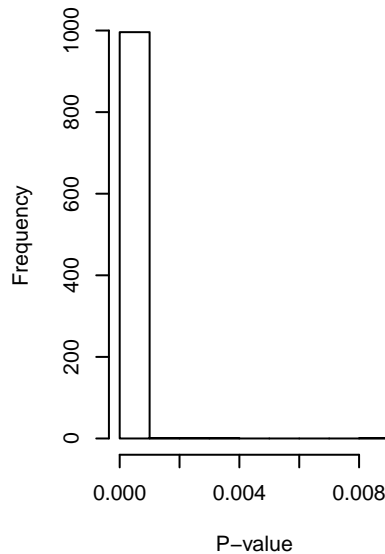

**PRKACA p-value Distribution**

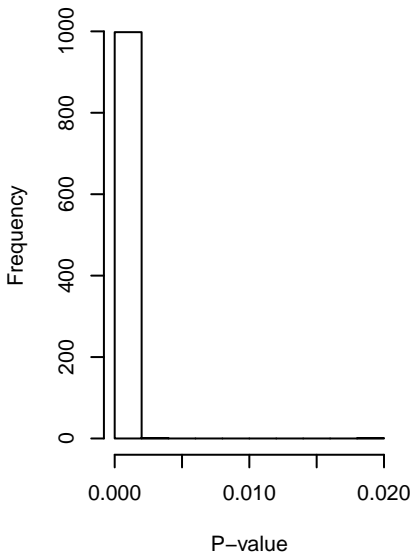

**MIF p-value Distribution**

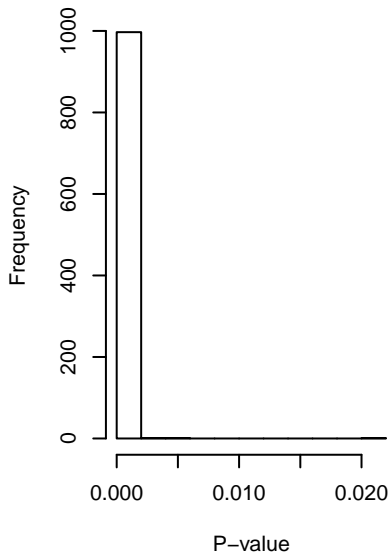

**TUBB p-value Distribution**

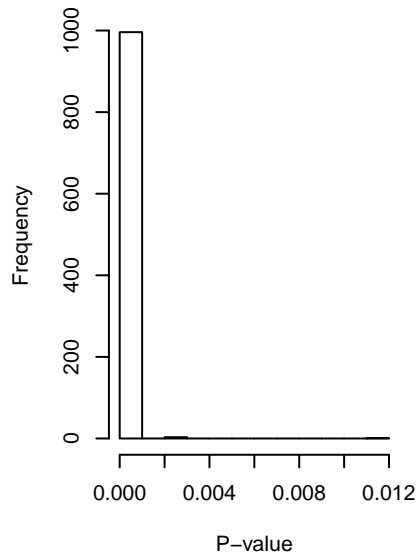

**NET1 p-value Distribution**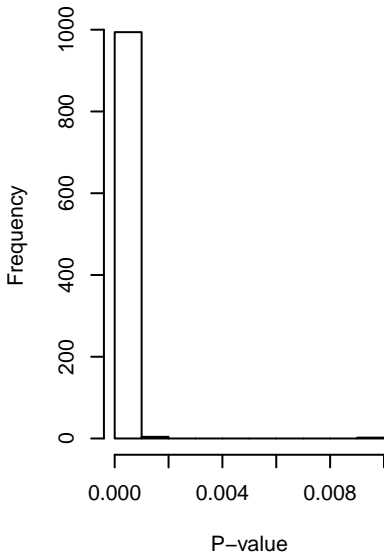**PAK2 p-value Distribution**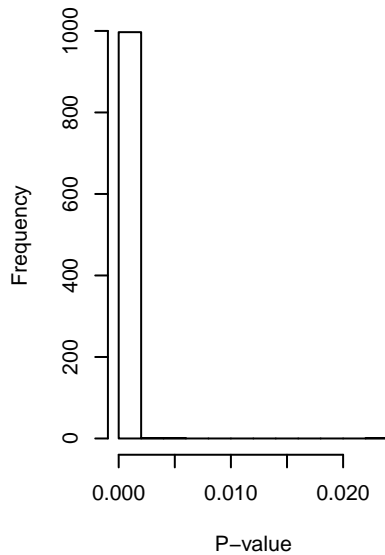**PAK1 p-value Distribution**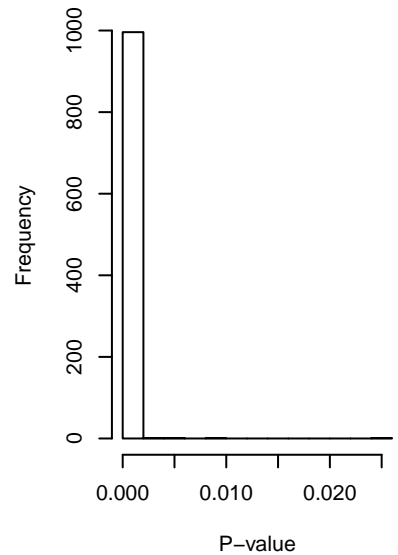**CLASP1 p-value Distribution**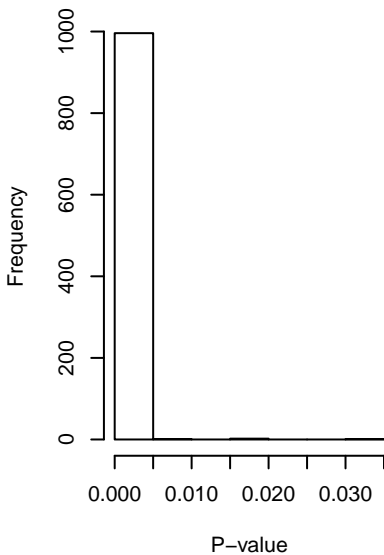**BRCC3 p-value Distribution**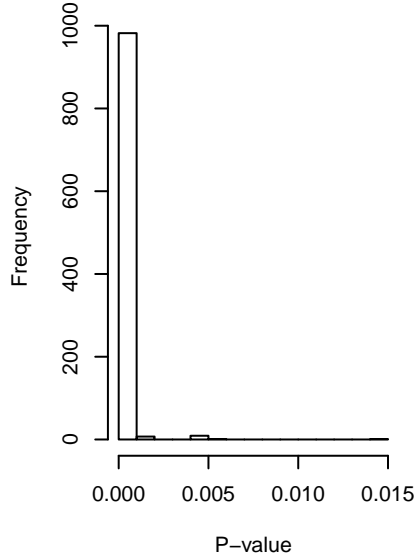**RAC3 p-value Distribution**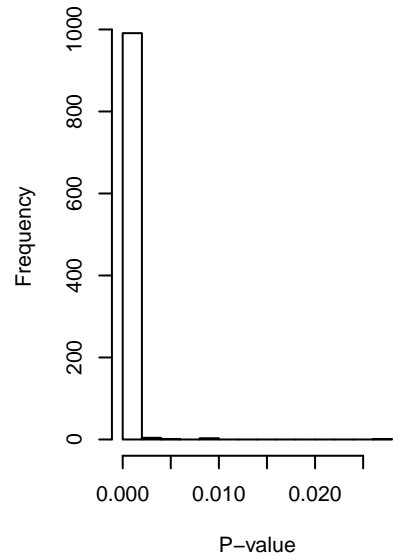

**PAK3 p-value Distribution**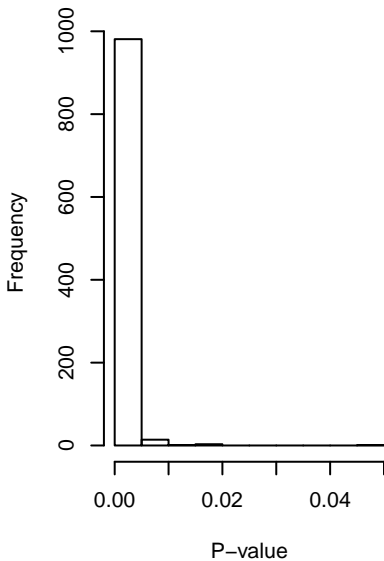**GNAO1 p-value Distribution**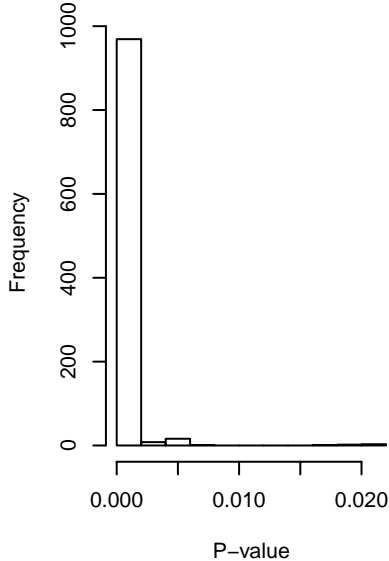**TUBB2A p-value Distribution**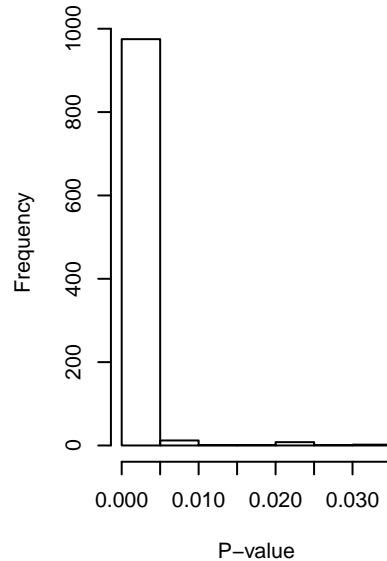**USP21 p-value Distribution**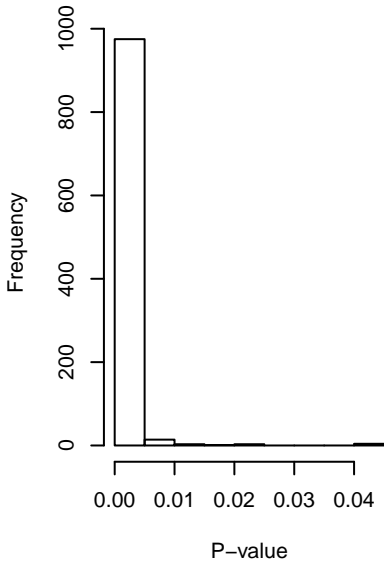**KIF2A p-value Distribution**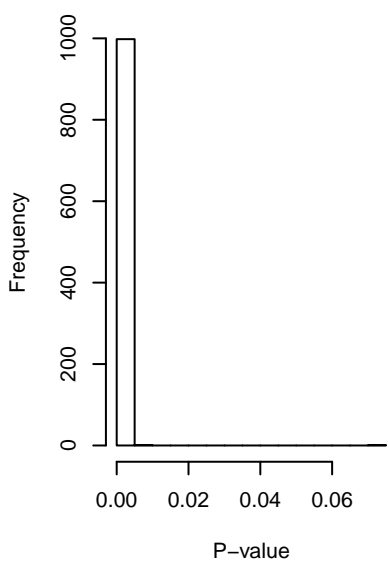**HDAC9 p-value Distribution**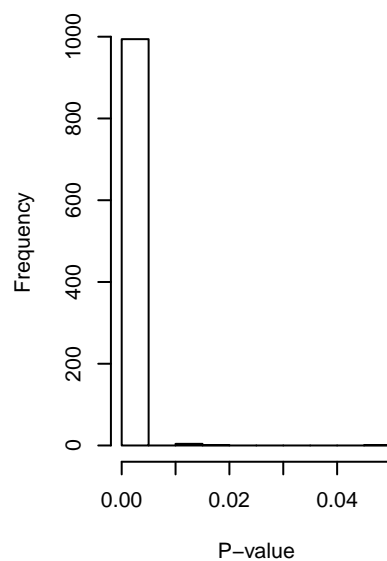

**KLC2 p-value Distribution**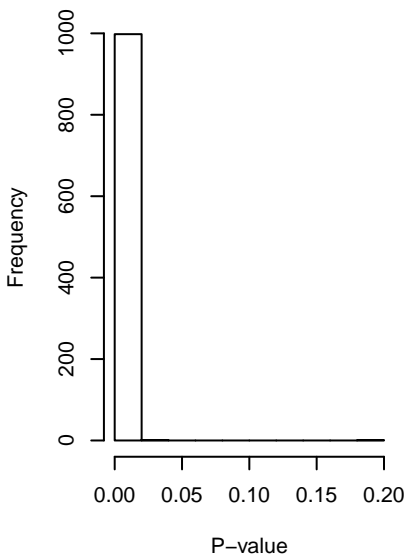**DYNLL1 p-value Distribution**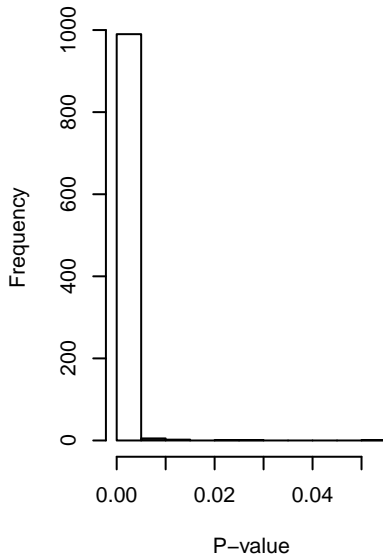**TUBB1 p-value Distribution**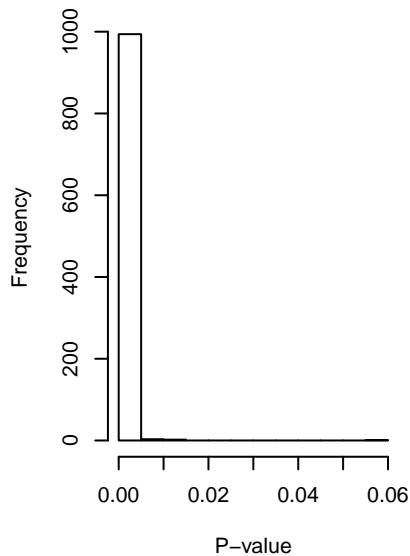**EPAS1 p-value Distribution**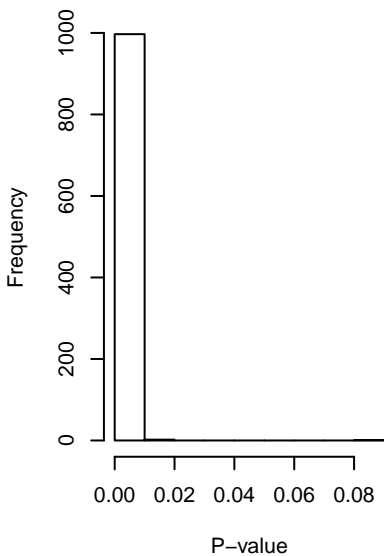**ATF2 p-value Distribution**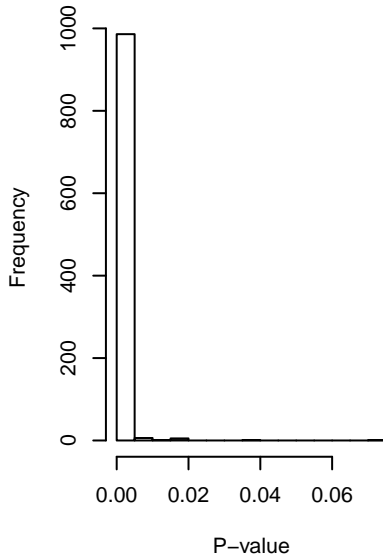**METAP2 p-value Distribution**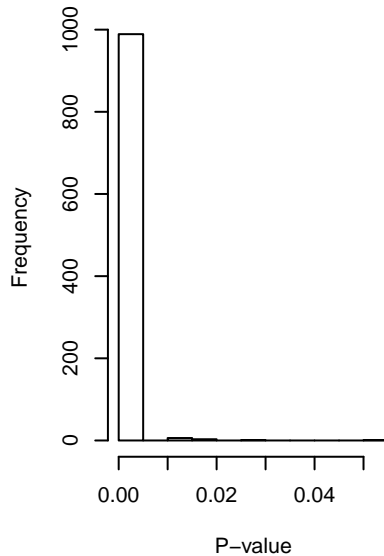

**LRIG1 p-value Distribution**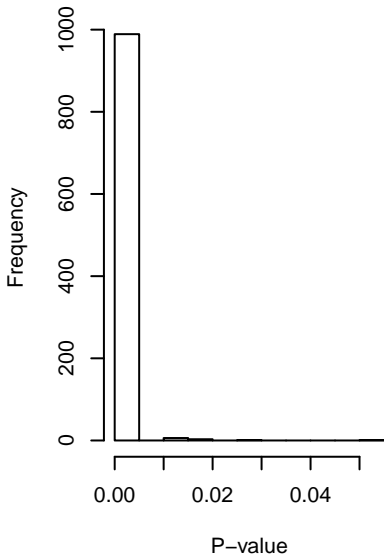**PARD3 p-value Distribution**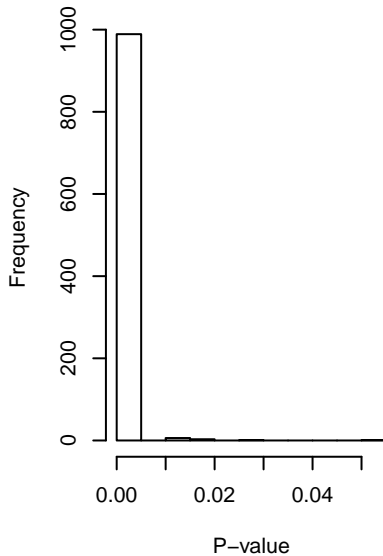**PKN1 p-value Distribution**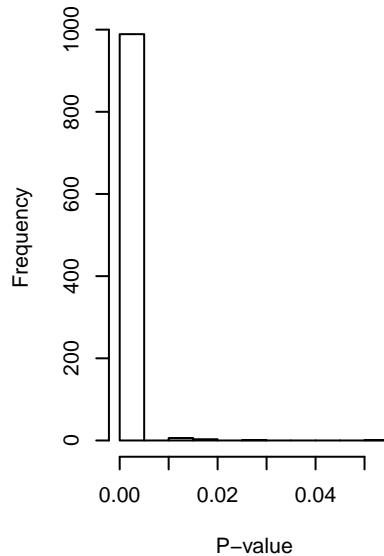**PKN2 p-value Distribution****PRICKLE1 p-value Distribution****PTPRU p-value Distribution**

**STK4 p-value Distribution**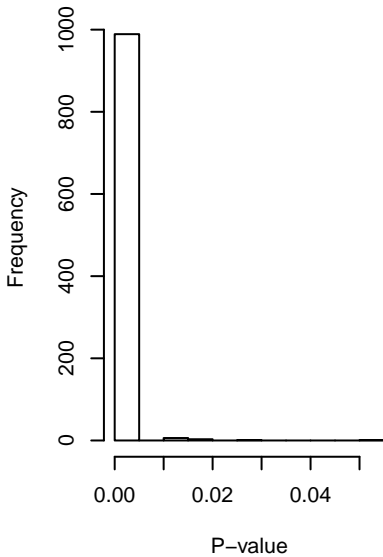**PAN2 p-value Distribution**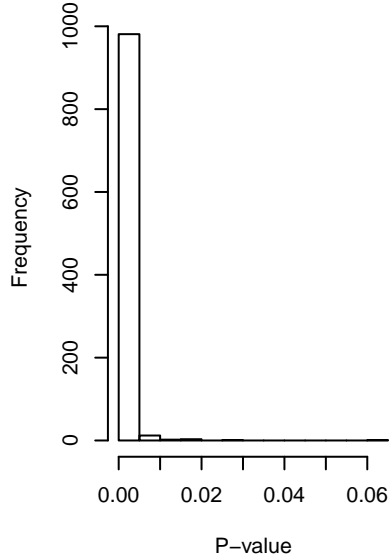**CDH1 p-value Distribution**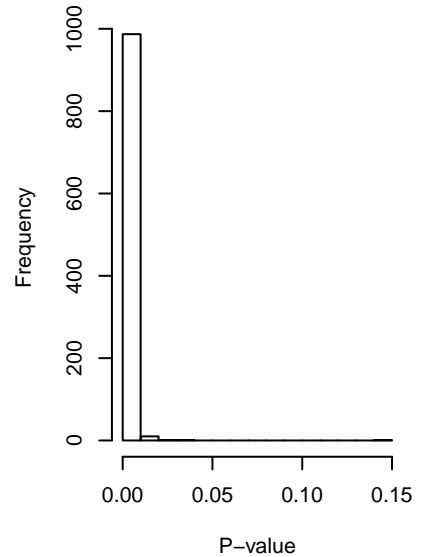**ADCY3 p-value Distribution**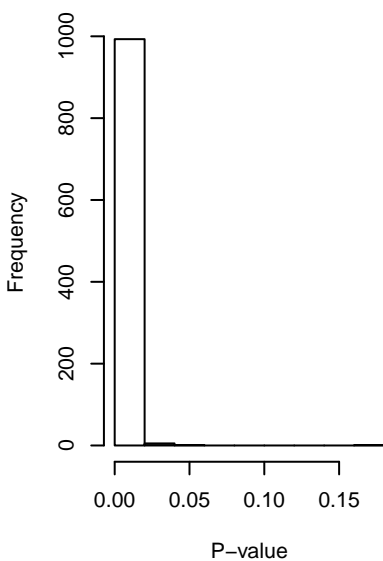**HIST3H3 p-value Distribution**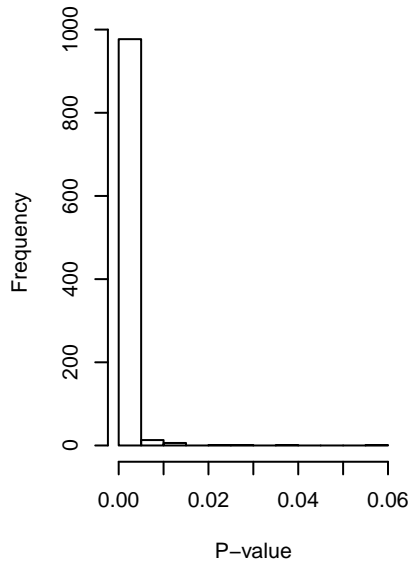**HK2 p-value Distribution**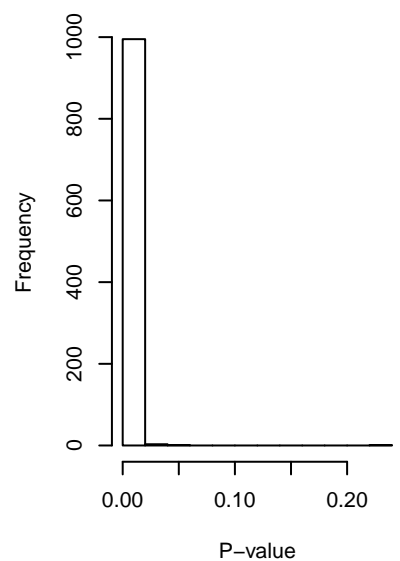

**PPP2R5E p-value Distribution**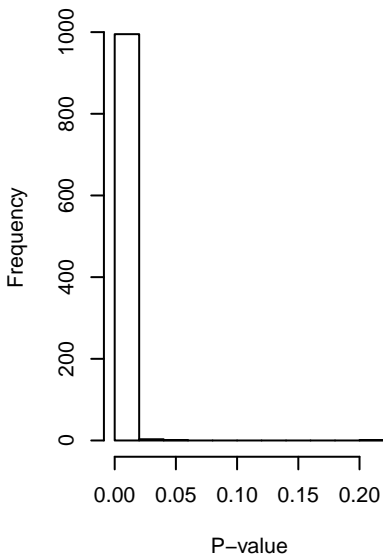**PPP2R5A p-value Distribution**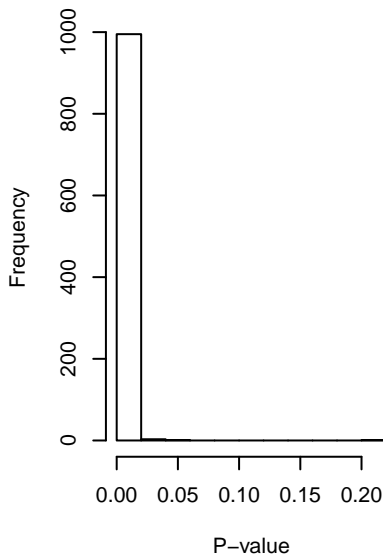**PRKCA p-value Distribution**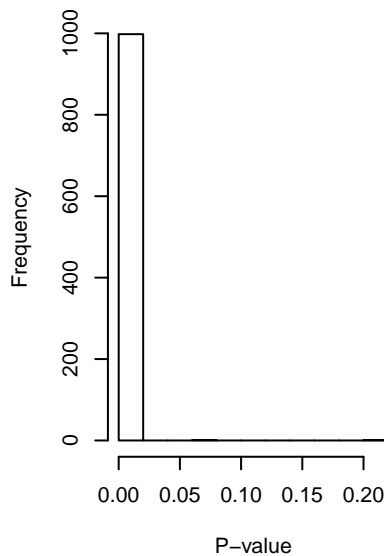**ADAM17 p-value Distribution**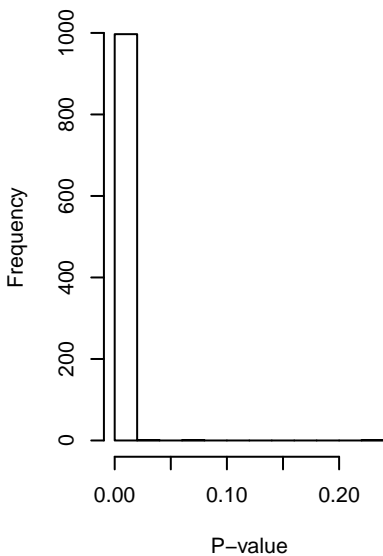**FGFR1 p-value Distribution**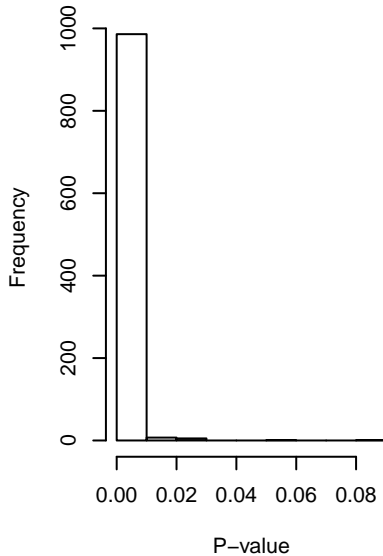**CXCR4 p-value Distribution**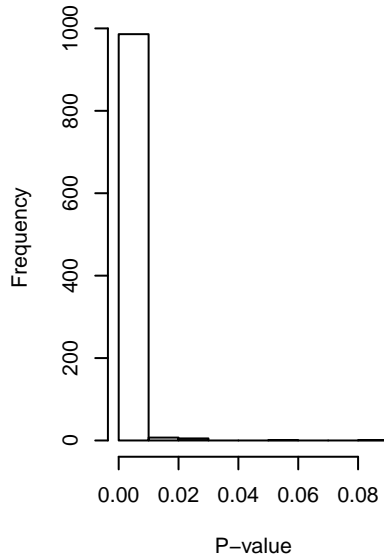

**SOS1 p-value Distribution**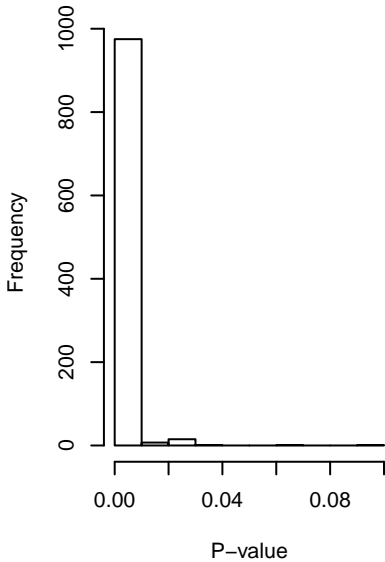**FYN p-value Distribution**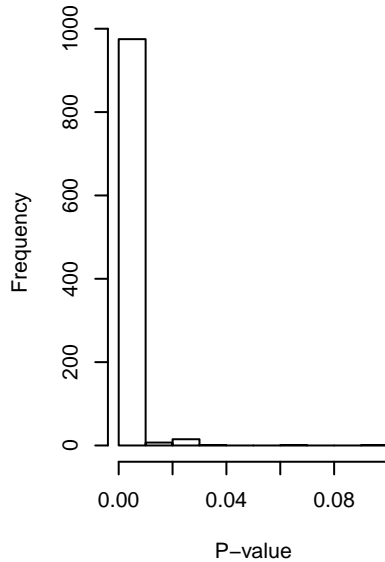**AKAP9 p-value Distribution**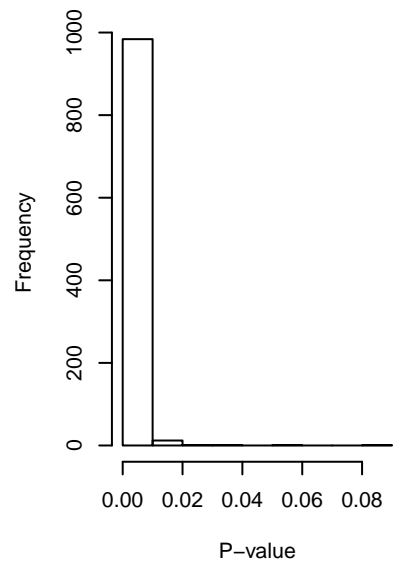**BUB1B p-value Distribution**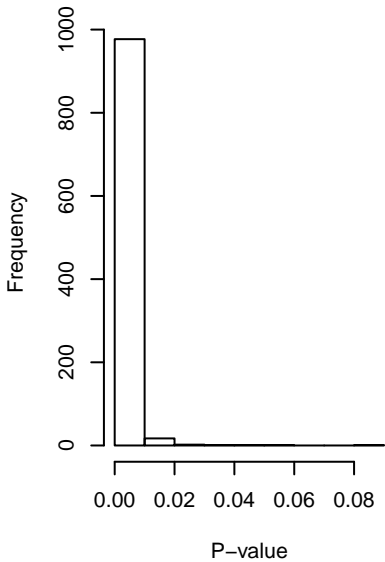**BUB1 p-value Distribution**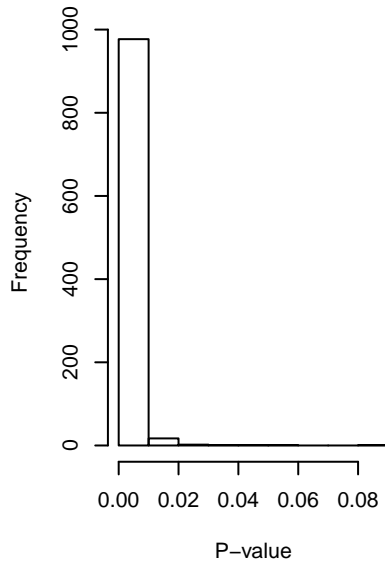**BUB3 p-value Distribution**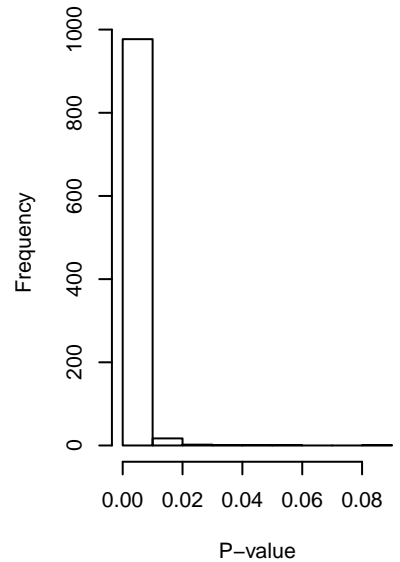



**CENPA p-value Distribution**

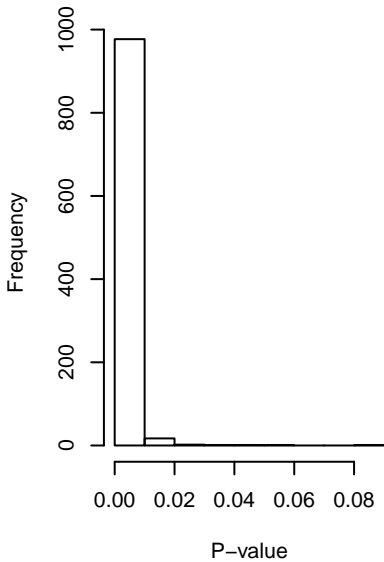

**CKAP5 p-value Distribution**

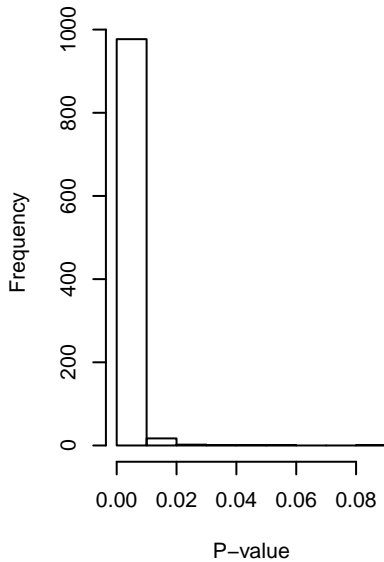

Supplement: peerj-07-6979-s002.pdf [file peerj-07-6979-s002.pdf]
